# Supplementary material for: Predicting domain-domain interactions using a parsimony approach
Source: Springer Nature journal article supplement (doi:10.1186/gb-2006-7-11-r104), 2006-11-09

### Comparison of Sensitivity in Mediating Domain Pair Prediction Experiment

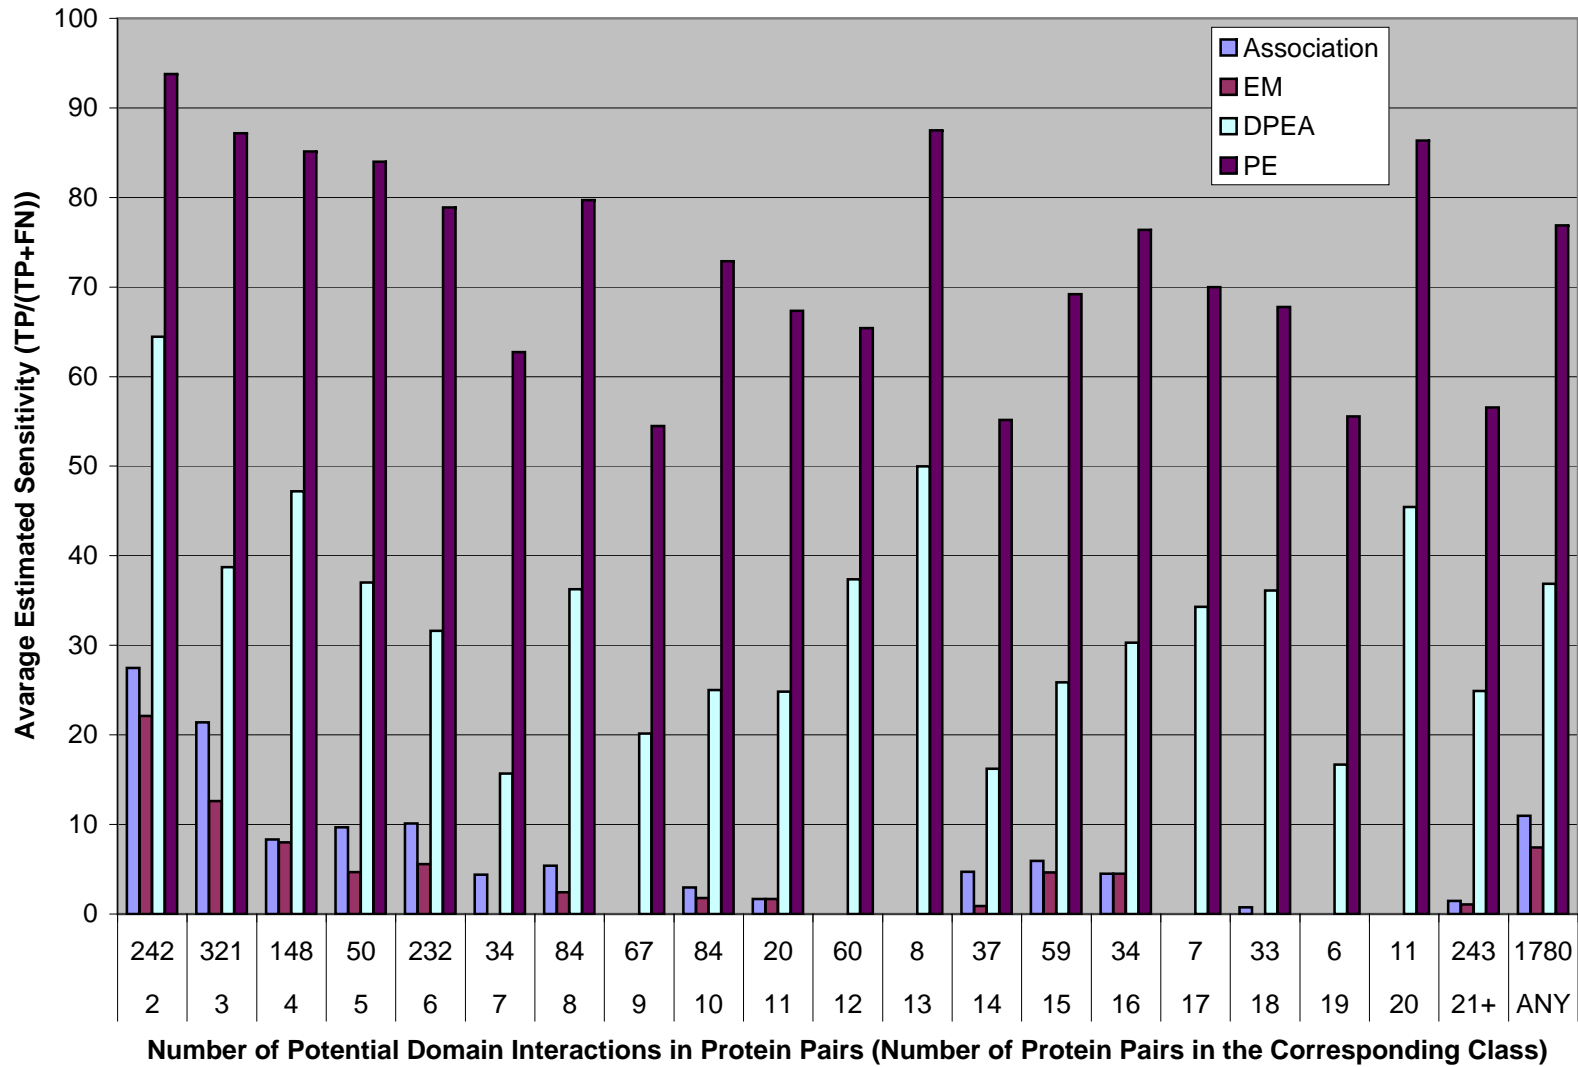

Supplement: Additional file 7 [file gb-2006-7-11-r104-s7.pdf]
